# Supplementary figures and images for: Curcumin Modulates Oxidative Stress, Fibrosis, and Apoptosis in Drug-Resistant Cancer Cell Lines
Source: MDPI journal article supplement (doi:10.3390/life12091427), 2022-09-13

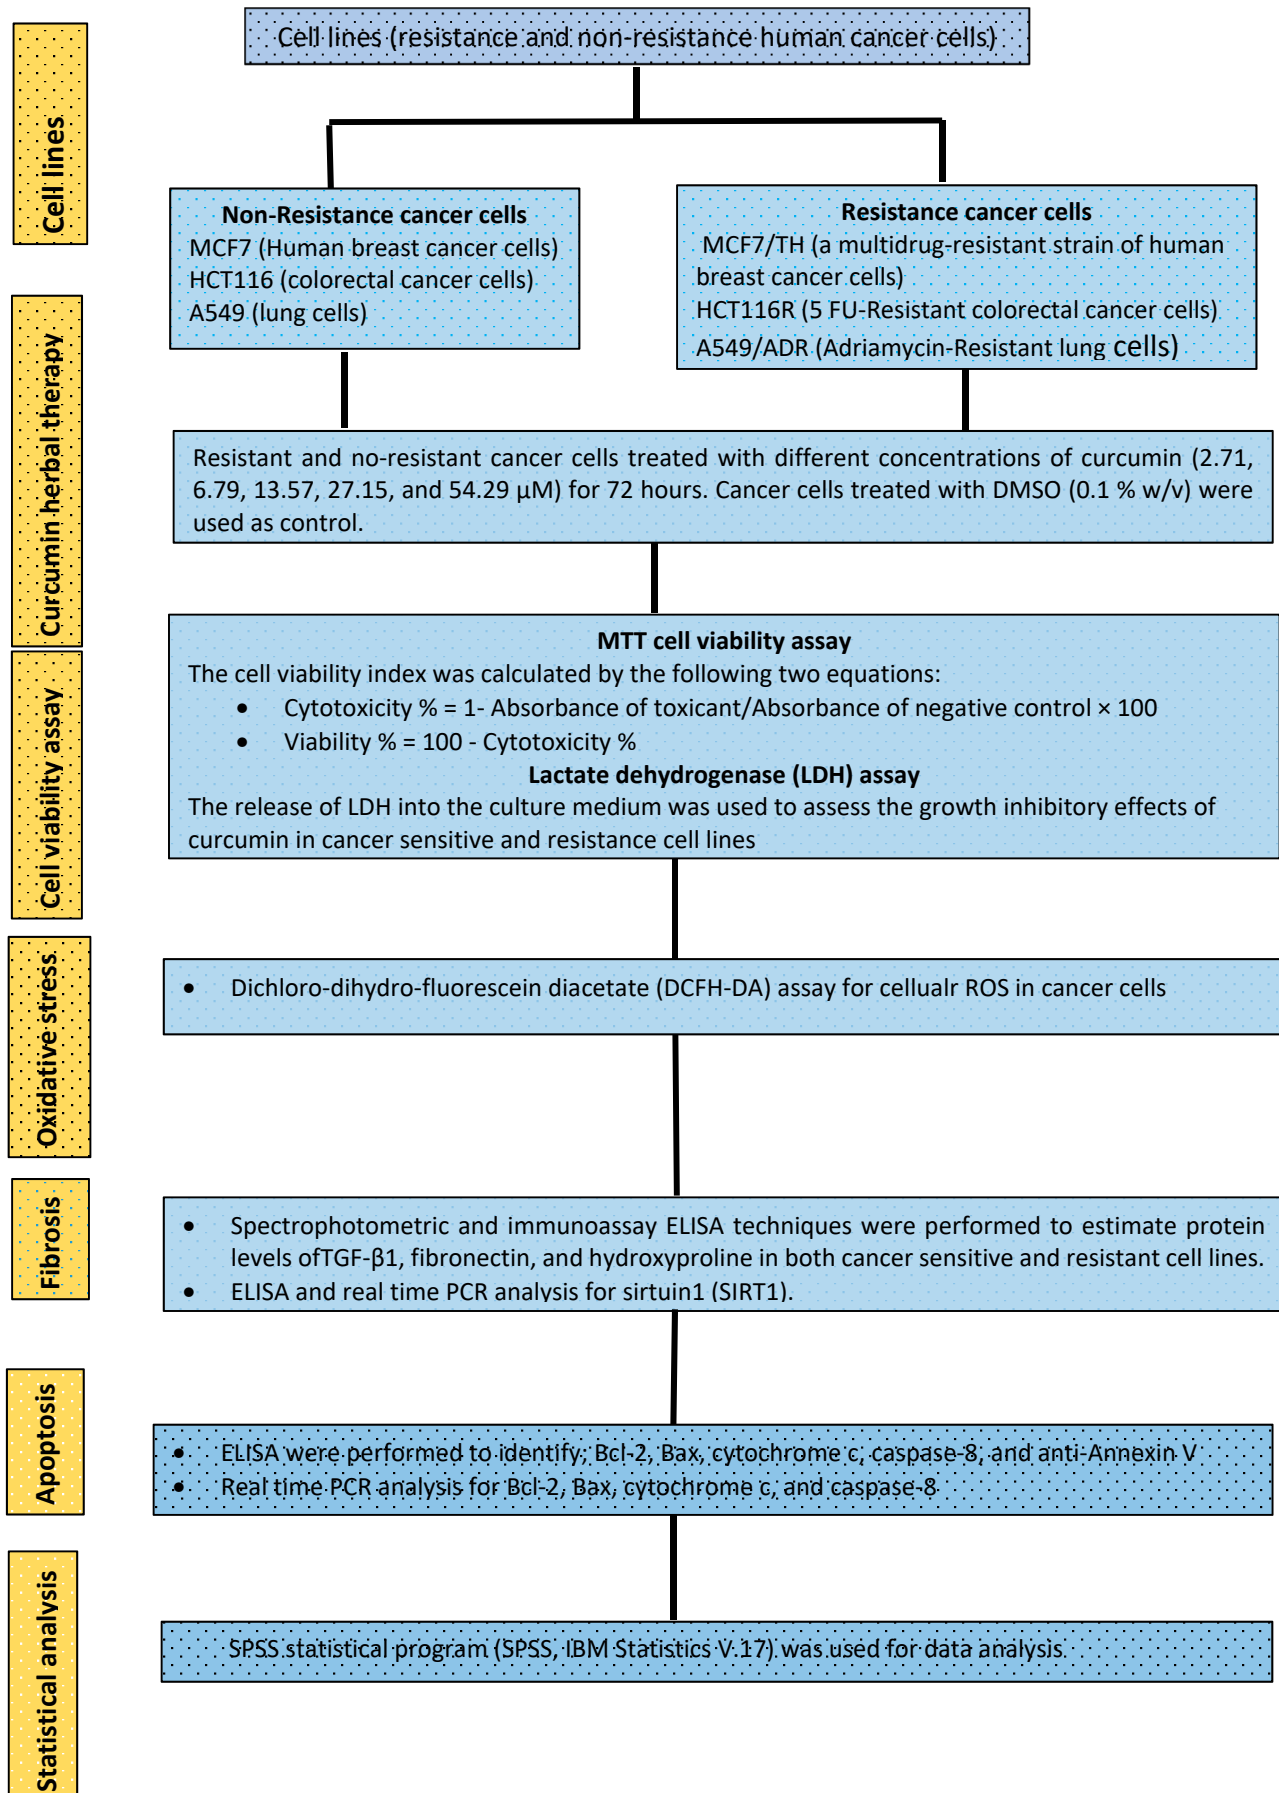

Supplementary Figure S1. Experimental methodology.

Supplement: s1 [file s1]
